# Supplementary material
Source: Springer Nature journal article supplement (https://www.springermedizin.de/resource/supplementary/12916_2009_227_MOESM1_ESM.pdf/9599438)
Supplement: MOESM1 [file 9599438]

**2114 of children eligible to participate in study**  
954 Cedar Rapids (CR)  
1160 Lakeville (LV)

**1323 children choose to participate**  
560 Cedar Rapids  
763 Lakeville

**791 excluded (did not return consent)**  
394 Cedar Rapids  
397 Lakeville

Schools matched within district and then  
randomized to condition

5 schools randomly assigned to  
**experimental** group

288 Cedar Rapids  
382 Lakeville

5 schools randomly assigned to **control**  
group

272 Cedar Rapids  
381 Lakeville

**Dropouts - Includes parents and children**

Time 1: CR-6 moved away, 4 opt out  
LV-1 moved away, 14 opt out, 3 other

Time 2: CR- 4 moved away, 18 opt out  
LV- 37 opt out, 1 other

Time 3: CR-2 moved away, 22-opt out  
LV- 29 opt out

**Dropouts - Includes parents and children**

Time 1: CR - 6 moved away, 1 opt out  
LV - 2 opt out, 4 other

Time 2: CR - 9 moved away, 4 opt out, 1 other  
LV - 3 moved away, 4 opt out

Time 3: CR - 3 moved away, 11 opt out  
LV- 18 opt out
